# Supplementary material for: A Pair-Electrosynthesis for Formate at Ultra-Low Voltage Via Coupling of CO2 Reduction and Formaldehyde Oxidation
Source: PubMed Central journal article supplement (PMC9626726; doi:10.1007/s40820-022-00953-y), 2022-11-01
Supplement: 40820_2022_953_MOESM1_ESM.pdf [file 40820_2022_953_MOESM1_ESM.pdf]

Supporting Information for

## A Pair-Electrosynthesis for Formate at Ultra-Low Voltage via Coupling of CO<sub>2</sub> Reduction and Formaldehyde Oxidation

Mengyu Li<sup>1</sup>, Tehua Wang<sup>1</sup>, Weixing Zhao<sup>1</sup>, Shuangyin Wang<sup>1</sup>, Yuqin Zou<sup>1,2,\*</sup><sup>1</sup>State Key Laboratory of Chemo/Bio-Sensing and Chemometrics, College of Chemistry and Chemical Engineering, Advanced Catalytic Engineering Research Center of the Ministry of Education, Hunan University, Changsha 410082, P. R. China<sup>2</sup>School of Chemistry and Chemical Engineering, Jishou University, Jishou Hunan 416000\*Corresponding author. E-mail: [yuqin\\_zou@hnu.edu.cn](mailto:yuqin_zou@hnu.edu.cn) (Yuqin Zou)

### Supplementary Figures and Tables

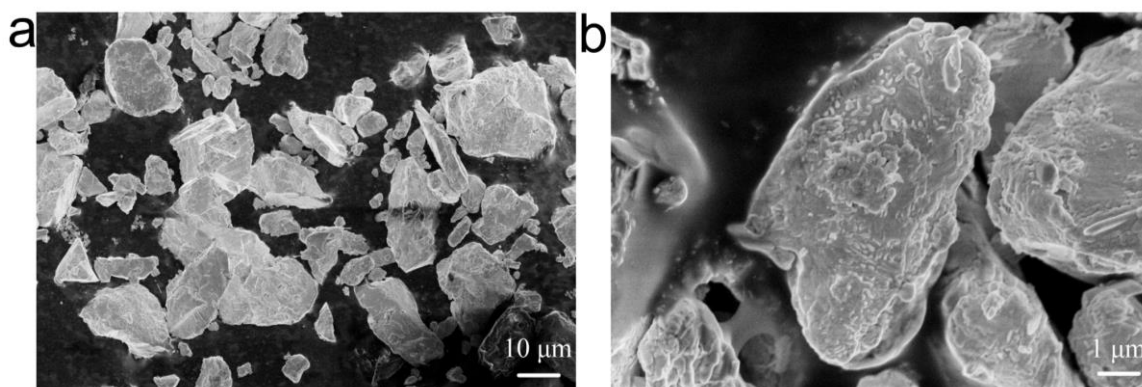

Fig. S1 SEM images of commercial Bi powder at different magnifications

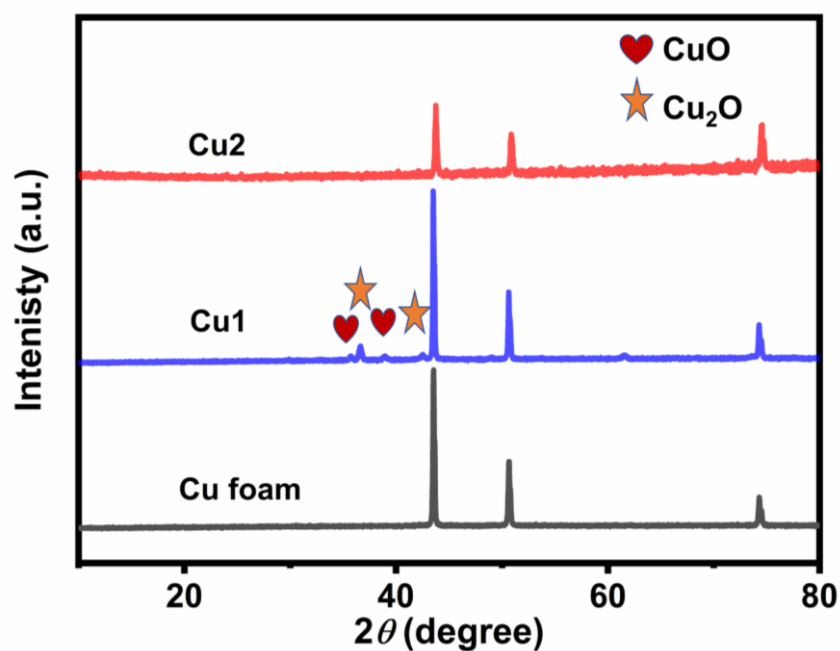

Fig. S2 XRD patterns of Cu foam, Cu1 and Cu2

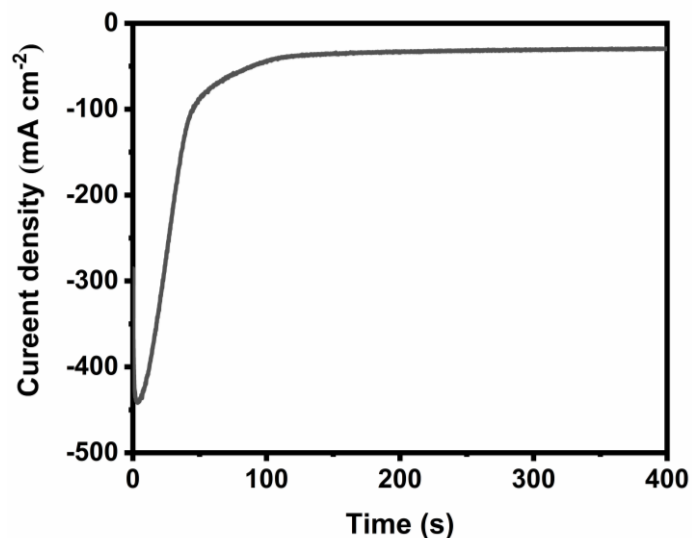

**Fig. S3** Electrochemical reduction curve of CuO/Cu<sub>2</sub>O at -0.4 V<sub>RHE</sub> for 400 s in 1 M KOH electrolyte

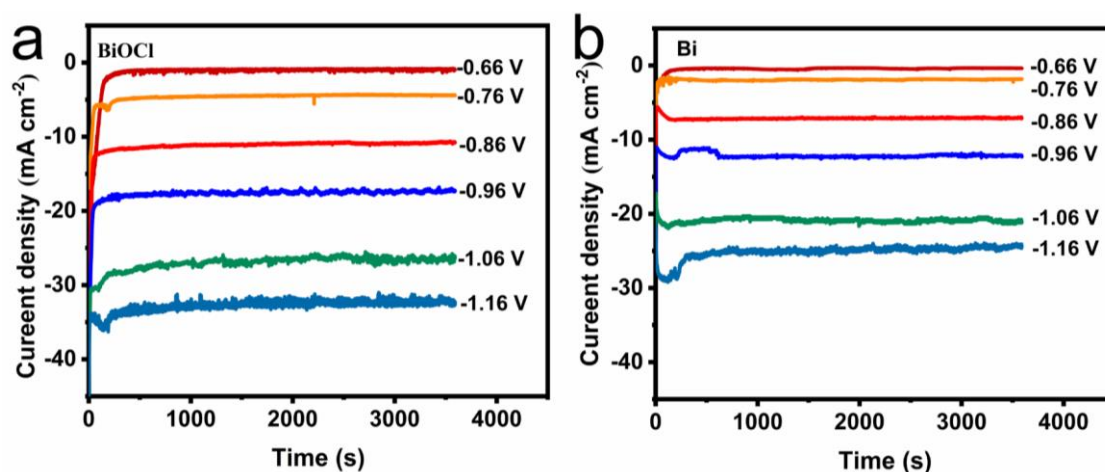

**Fig. S4** Constant potential electrolysis of (a) BiOCl and (b) commercial Bi powder at the different potentials in H-cell

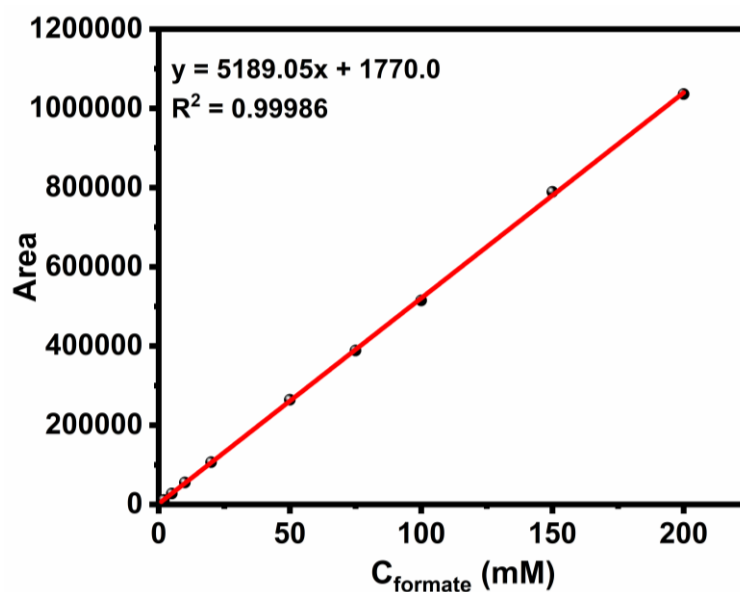

**Fig. S5** Standard curve between the known concentration of formate and relative area measured by HPLC

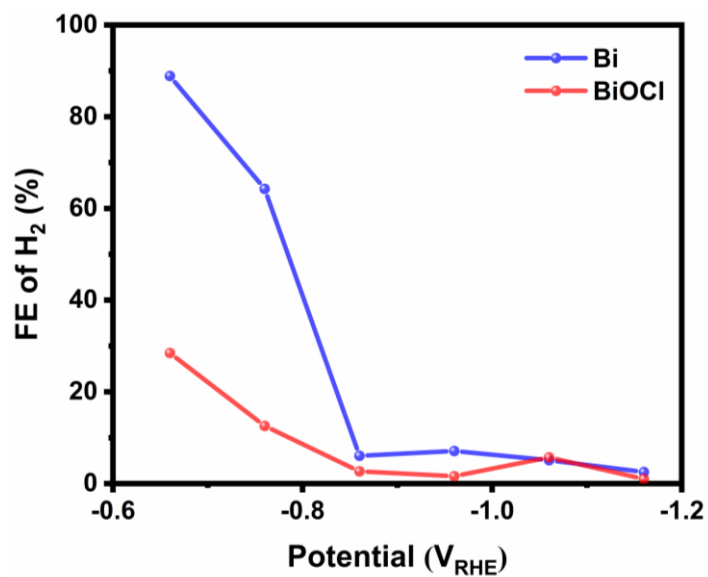

**Fig. S6** Potential-dependent FE of CO<sub>2</sub> reduction gas product for BiOCl and commercial Bi powder

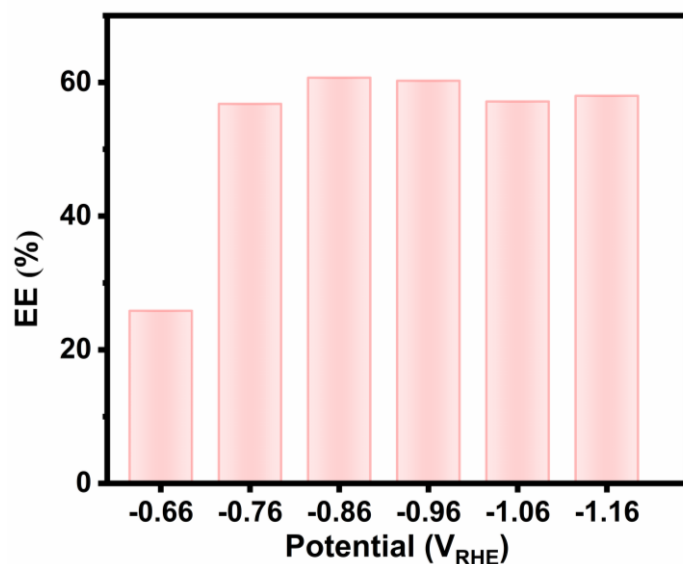

**Fig. S7** EE of BiOCl nanosheet for cathodic CO<sub>2</sub>RR in H cell

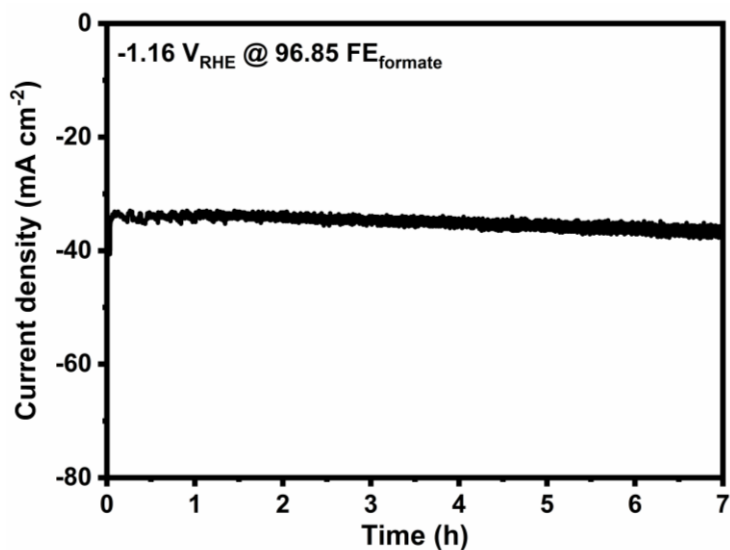

**Fig. S8** Long-term stability test of BiOCl nanosheet at -1.16 V<sub>RHE</sub> in H-cell

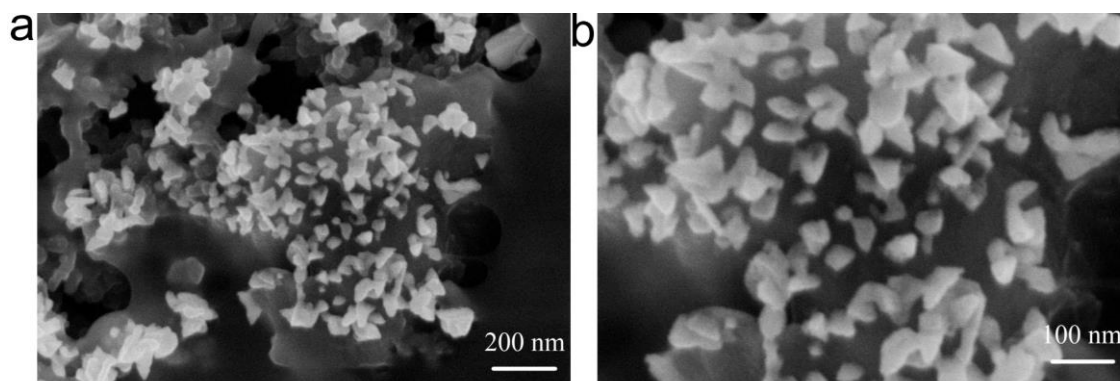

**Fig. S9** SEM images of BiOCl nanosheet after CO<sub>2</sub>RR

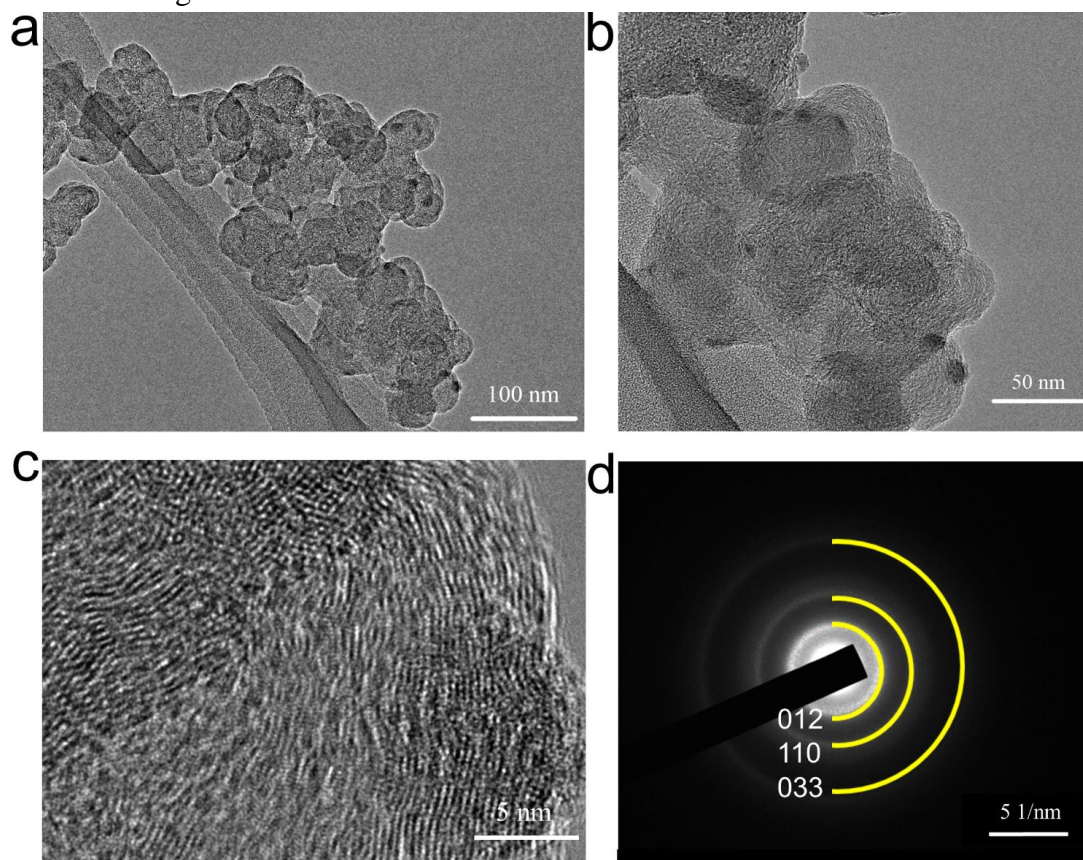

**Fig. S10** (a, b) TEM images, (c) HRTEM image, (d) SAED pattern of BiOCl nanosheet after CO<sub>2</sub>RR

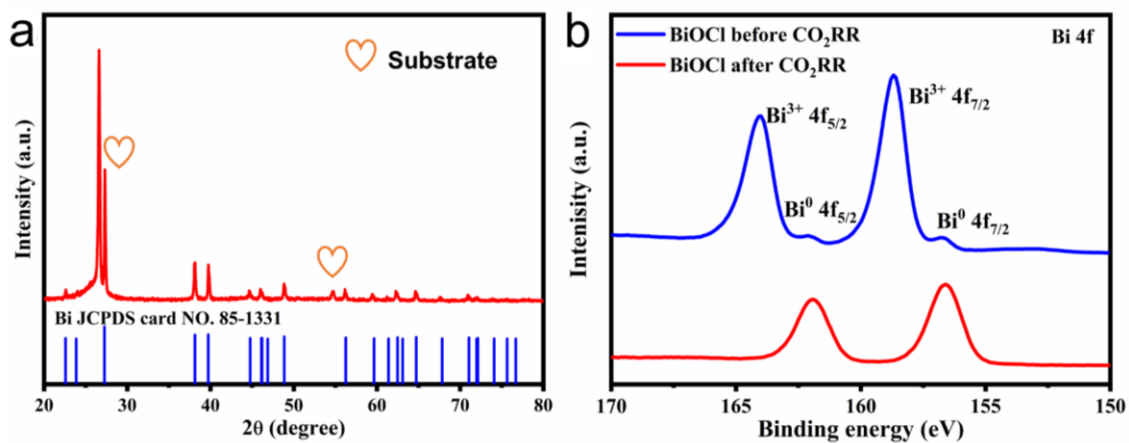

**Fig. S11** (a) XRD pattern and (b) Bi 4f XPS spectrum of BiOCl nanosheet after CO<sub>2</sub>RR

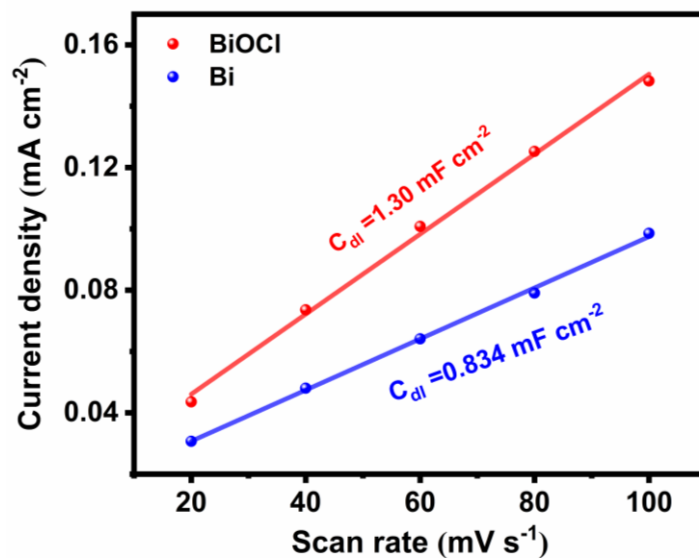

Fig. S12 The capacitive current density differences plotted against scan rates

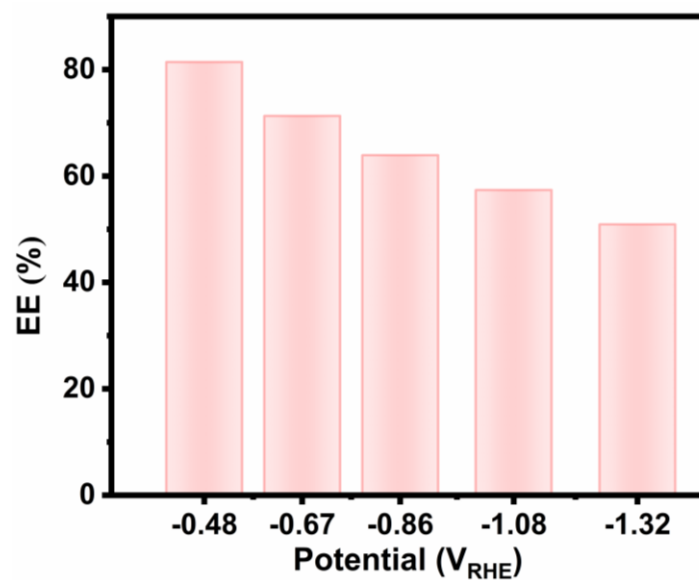

Fig. S13 EE of BiOCl nanosheet for cathodic CO<sub>2</sub>RR in flow cell

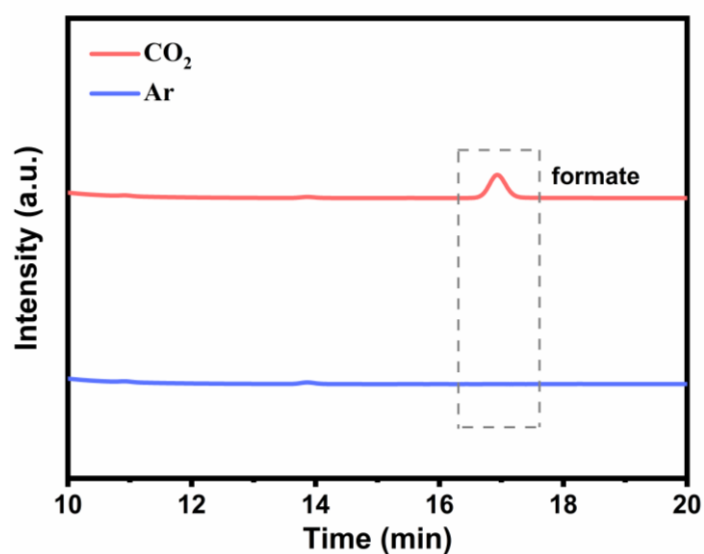

Fig. S14 HPLC spectrum of BiOCl nanosheet after electrolysis at -0.48 V<sub>RHE</sub>

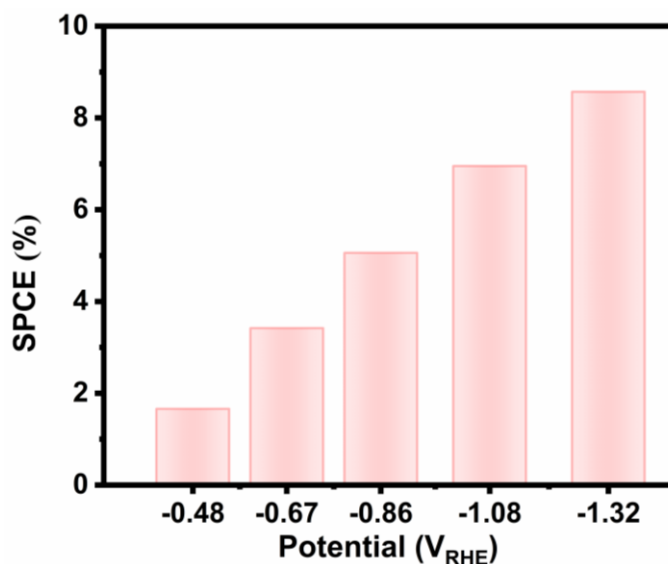

Fig. S15 SPCE of CO<sub>2</sub> toward formate using BiOCl nanosheet in flow cell

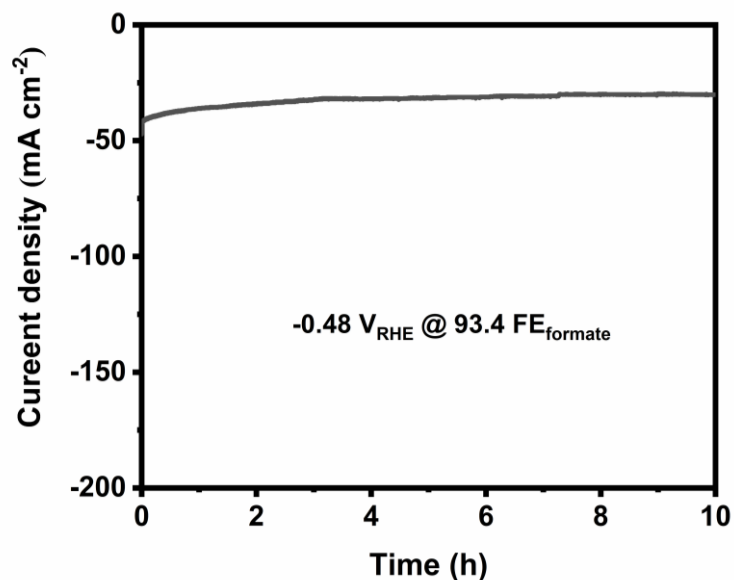

Fig. S16 Long-term stability test of BiOCl nanosheet in flow cell at -0.48 V<sub>RHE</sub>

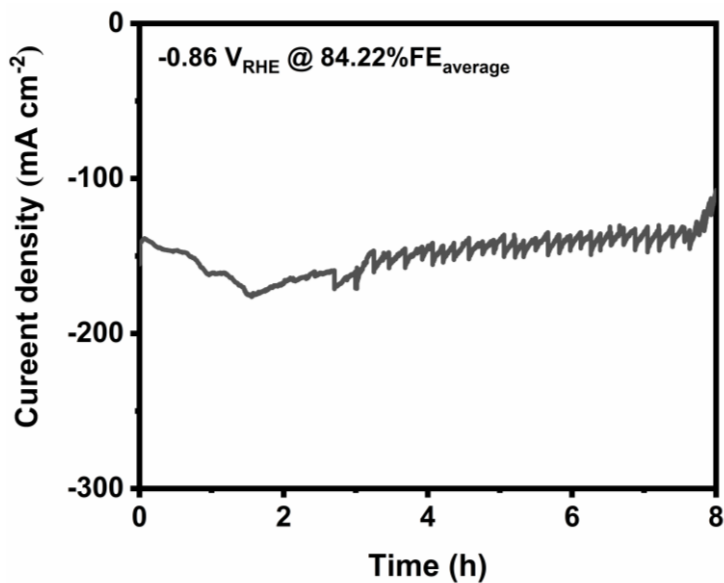

Fig. S17 Long-term stability test of BiOCl nanosheet in flow cell at -0.86 V<sub>RHE</sub>

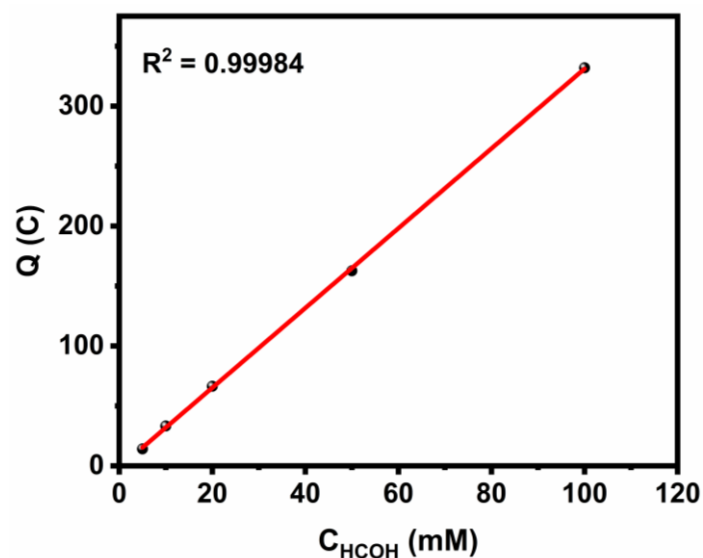

**Fig. S18** Linear relationship between the concentration of formaldehyde and the charge consumed

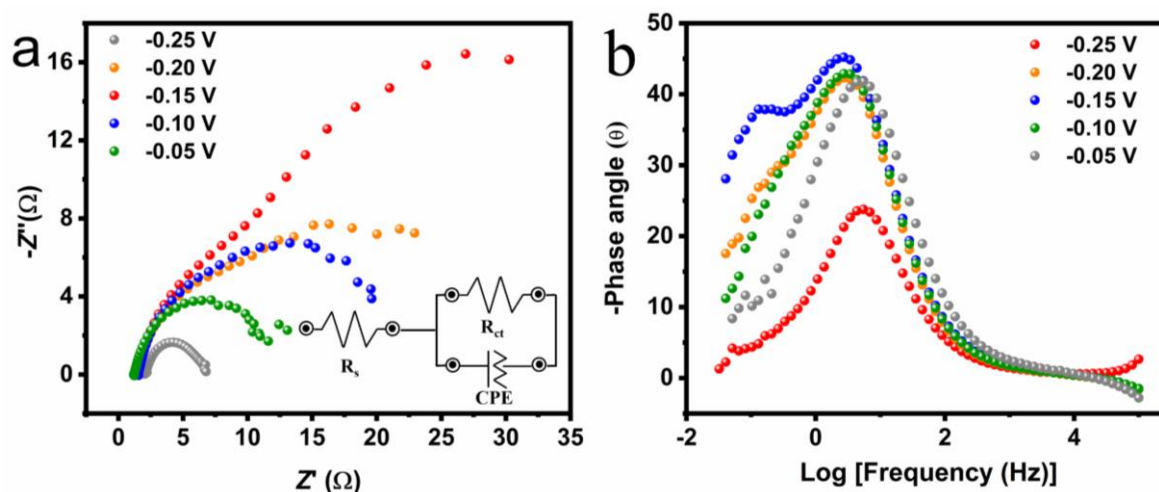

**Fig. S19** (a) Nyquist plots and (b) Bode phase plots of  $\text{Cu}_2\text{O}$  in 1 M KOH with the addition of 100 mM formaldehyde at different potentials

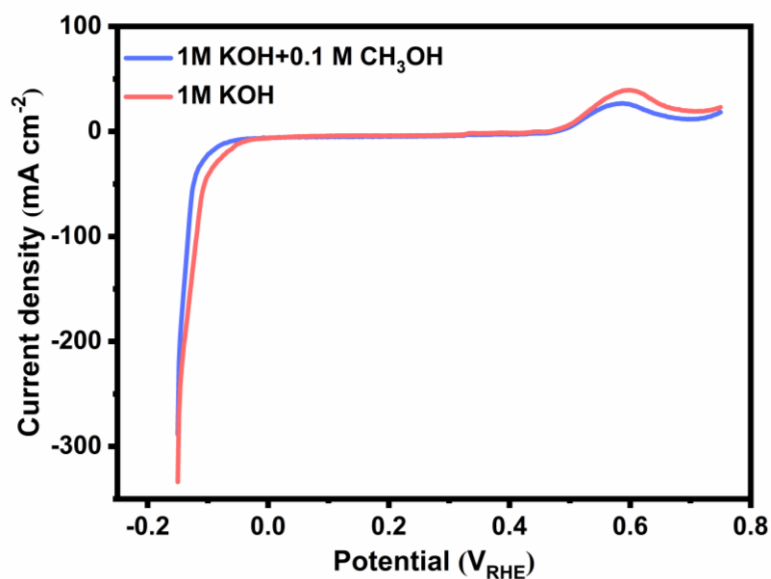

**Fig. S20** LSV curves of  $\text{Cu}_2\text{O}$  in 1 M KOH electrolyte with or without  $\text{CH}_3\text{OH}$

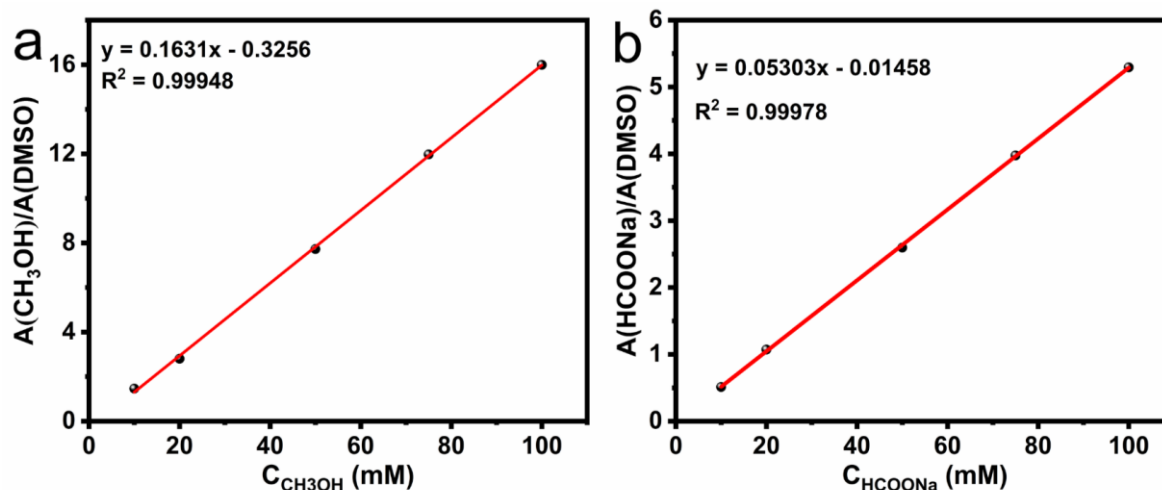

**Fig. S21** (a) Linear relationship between the concentration of methanol and the ratio of relative area to reference sample (DMSO) area. (b) Linear relationship between the concentration of formate and the ratio of relative area and reference sample (DMSO) area

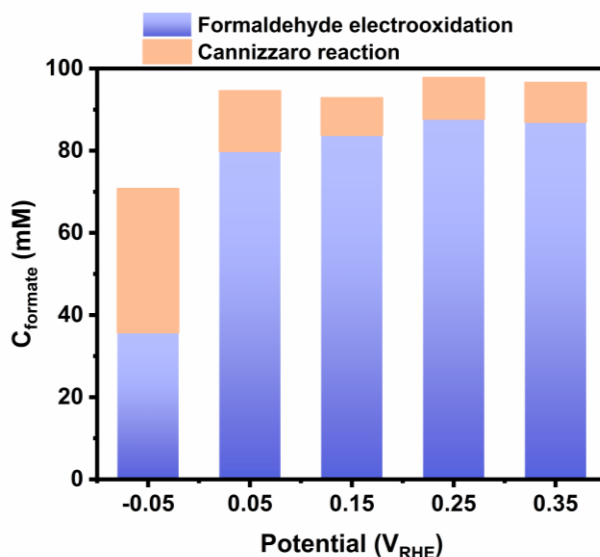

**Fig. S22** Formate concentration formed by formaldehyde electrooxidation and Cannizzaro reaction

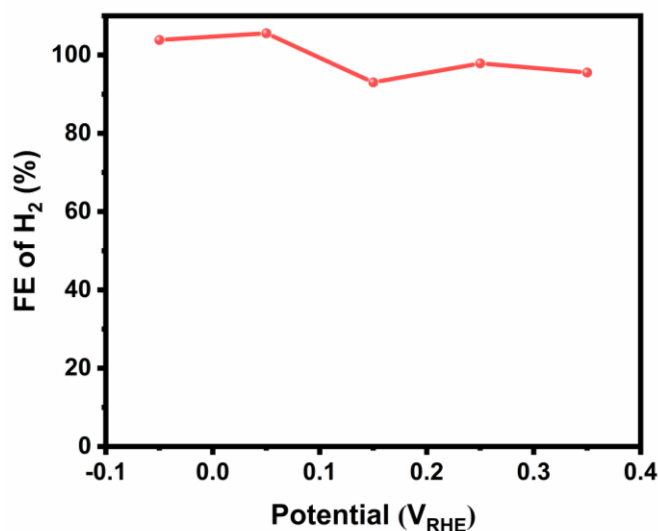

**Fig. S23**  $\text{H}_2$  FE of  $\text{Cu}_2\text{O}$  for FOR at different potentials



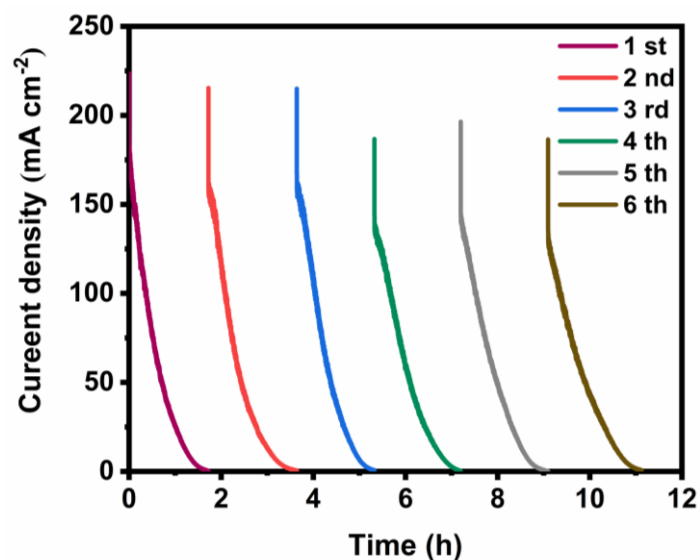

Fig. S24 *I-t* curves using Cu<sub>2</sub>O for six successive electrolysis cycles

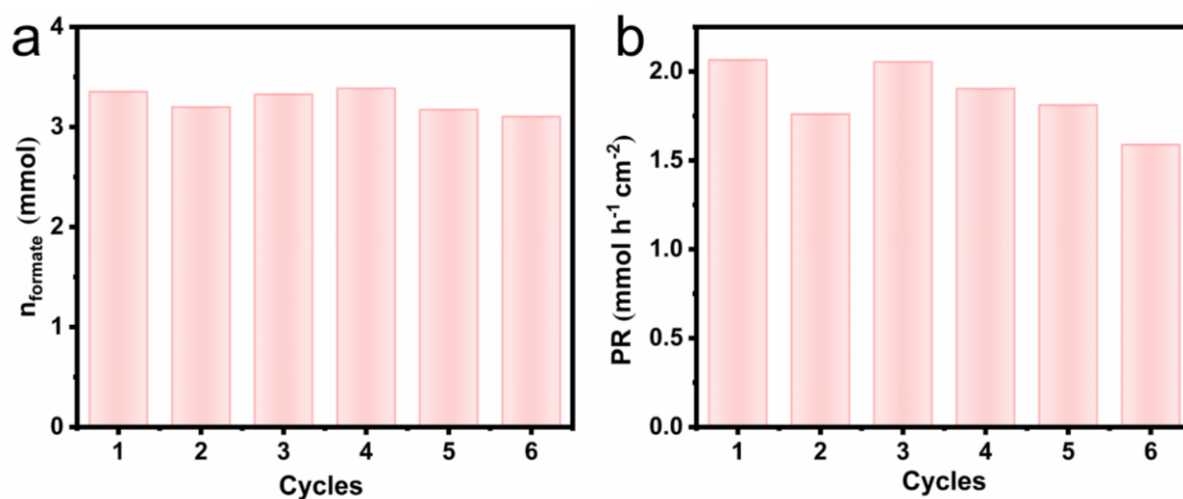

Fig. S25 (a) Moles and (b) production rate of formate using Cu<sub>2</sub>O for six successive electrolysis cycles

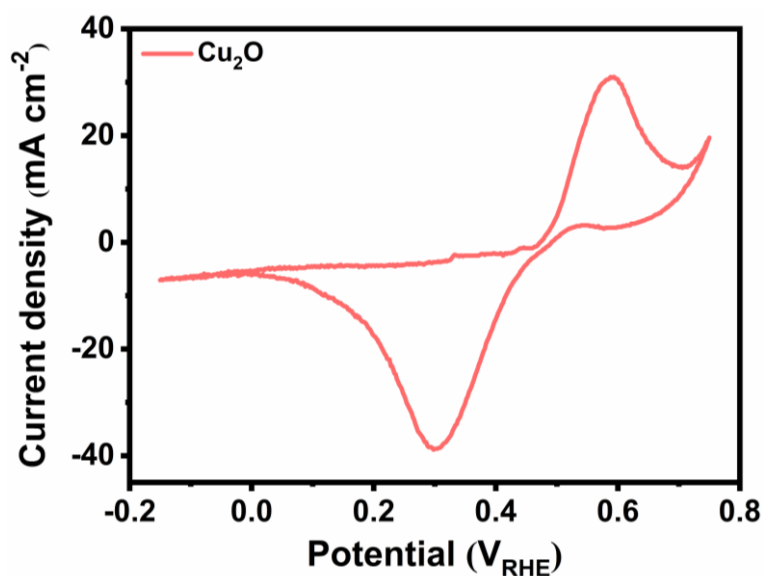

Fig. S26 CV curve of Cu<sub>2</sub>O in 1 M KOH electrolyte

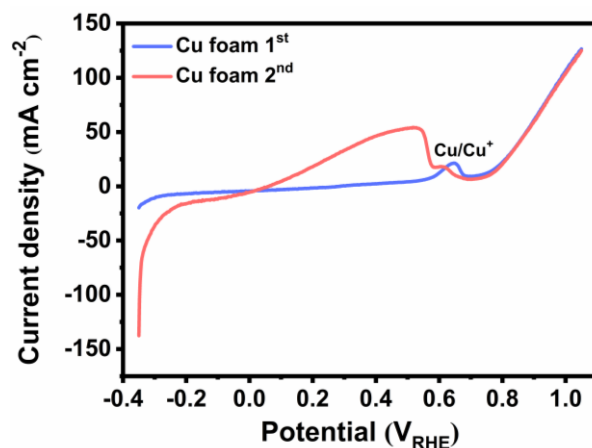

**Fig. S27** LSV curves of Cu foam and Cu foam oxidation followed by reduction in 1 M KOH electrolyte with 0.1 M formaldehyde

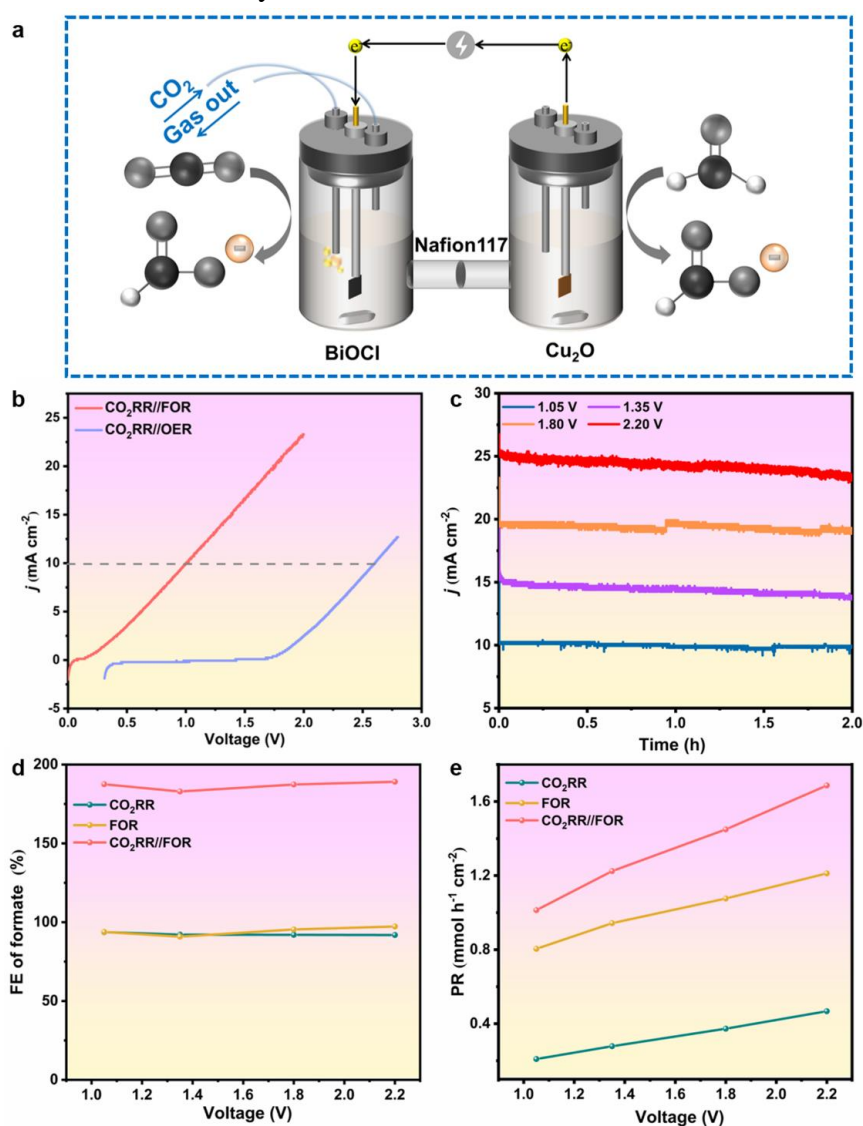

**Fig. S28** Electrochemical performance of CO<sub>2</sub>RR coupled with FOR in H-cell. (a) Schematic diagram for CO<sub>2</sub>RR coupled with FOR to realize the electrosynthesis of formate. (b) LSV curves of CO<sub>2</sub>RR//FOR and CO<sub>2</sub>RR//OER full cells. (c) Constant potential electrolysis of CO<sub>2</sub>RR//FOR full cell at different voltages. (d) Voltage-dependent formate FE, (e) formate production rate of anodic FOR, cathodic CO<sub>2</sub>RR and CO<sub>2</sub>RR//FOR full cell

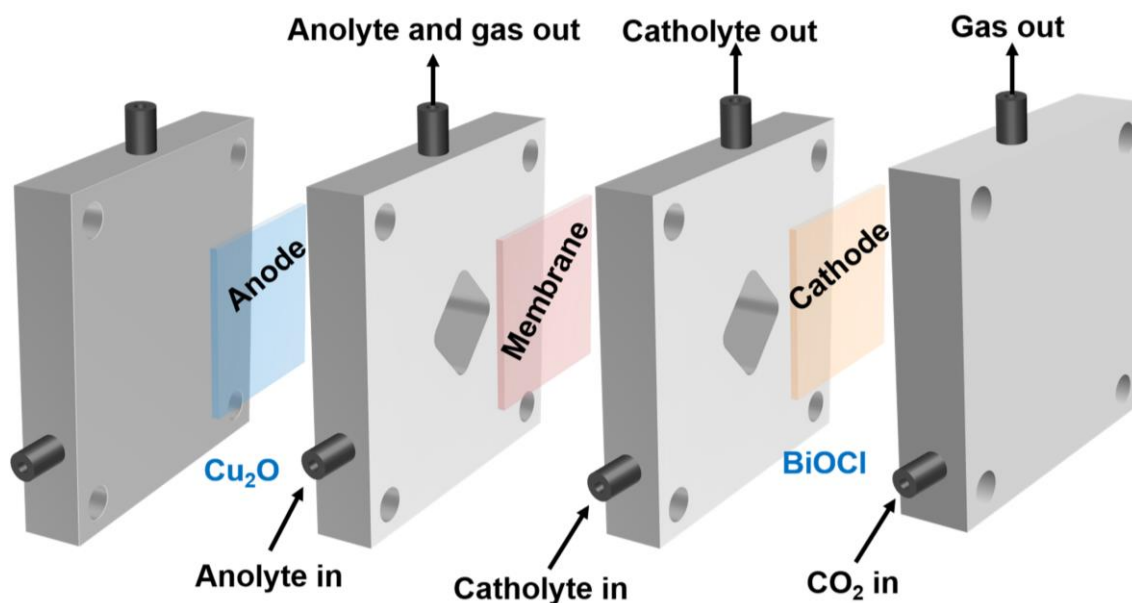

Fig. S29 Schematic diagram for CO<sub>2</sub>RR coupled with FOR in a liquid-phase flow cell

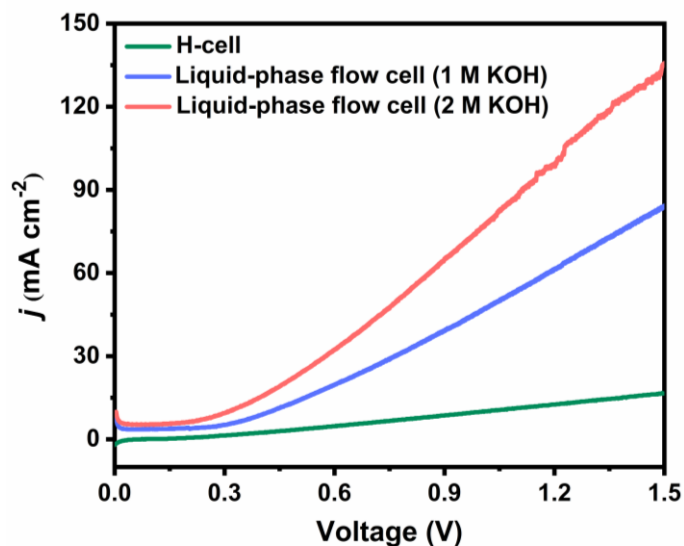

Fig. S30 LSV curves of CO<sub>2</sub>RR//FOR full cell in H-cell and liquid-phase flow cell

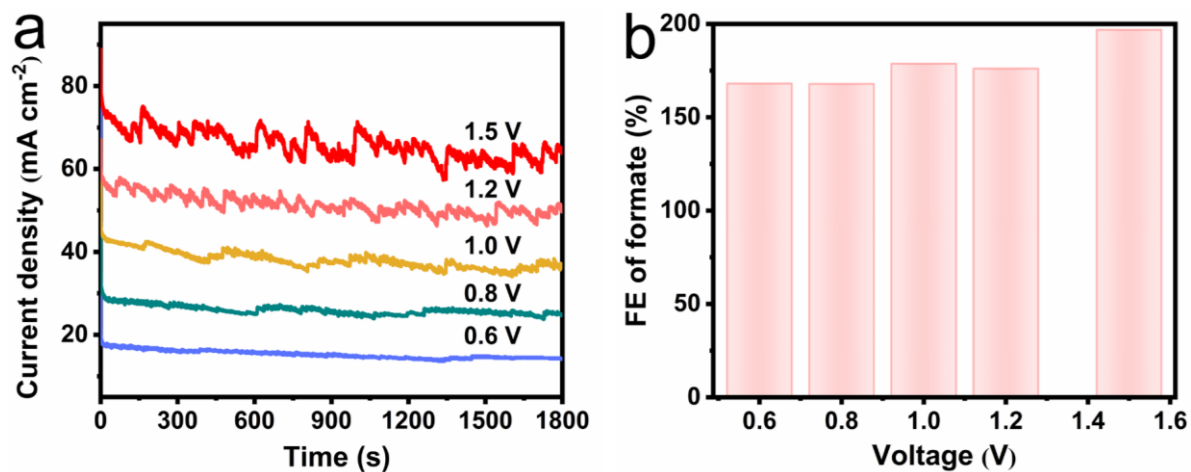

Fig. S31 (a) Chronoamperometry curves and (b) potential-dependent total formate FE in a liquid-phase flow cell with 1 M KOH electrolyte

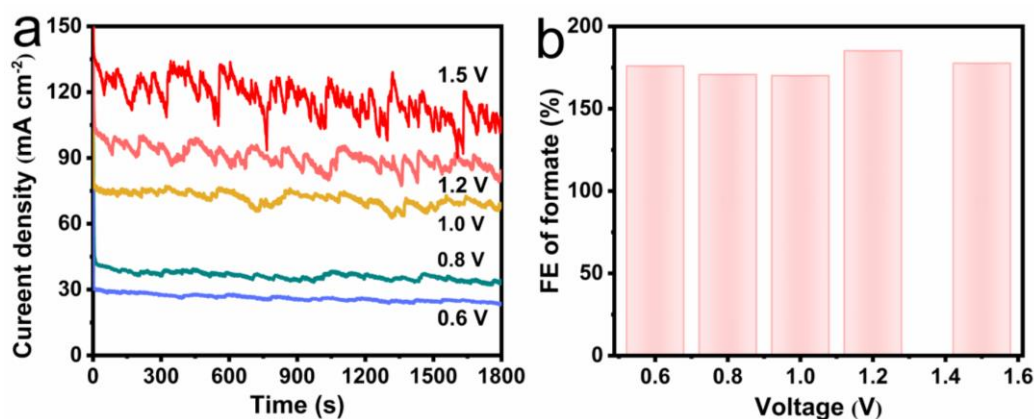

**Fig. S32** (a) Chronoamperometry curves and (b) potential-dependent total formate FE in a liquid-phase flow cell with 2 M KOH electrolyte

**Table S1** Gibb's free energy of formation at 25 °C and 101.325 kPa

| Molecular formula    | $\Delta_f G_m^0$ (kJ mol <sup>-1</sup> ) |
|----------------------|------------------------------------------|
| H <sub>2</sub> O (l) | -237.129                                 |
| O <sub>2</sub> (g)   | 0                                        |
| CO <sub>2</sub> (g)  | -394.359                                 |
| HCOOH (l)            | -361.35                                  |
| OH <sup>-</sup> (aq) | -157.244                                 |
| HCOH (g)             | -102.54                                  |

**Table S2** Comparison of electrocatalytic CO<sub>2</sub>RR to formate performance on various catalysts in H-cell from recent literature

| Catalysts                                                           | Electrolyte              | Potential (V <sub>RHE</sub> ) | FE (%) | $j_{\text{formate}}$ (mA cm <sup>-2</sup> ) | Refs.     |
|---------------------------------------------------------------------|--------------------------|-------------------------------|--------|---------------------------------------------|-----------|
| BiOCl                                                               | 0.5 M KHCO <sub>3</sub>  | -0.86                         | 90.7   | 11.11                                       | this work |
| BiOCl                                                               | 0.5 M KHCO <sub>3</sub>  | -1.16                         | 99.0   | 36.24                                       | this work |
| High crystalline Bi <sub>2</sub> O <sub>3</sub>                     | 0.5 M KHCO <sub>3</sub>  | -0.9                          | 91     | 8                                           | [S1]      |
| Bi <sub>2</sub> O <sub>3</sub> @C-800                               | 0.5 M KHCO <sub>3</sub>  | -0.9                          | 92     | 7.5                                         | [S2]      |
| Bi <sub>2</sub> O <sub>3</sub> NSs@MCCM                             | 0.1 M KHCO <sub>3</sub>  | -1.256                        | 93.8   | 14                                          | [S3]      |
| Bi/rGO                                                              | 0.1 M KHCO <sub>3</sub>  | -0.8                          | 98     | 2~3                                         | [S4]      |
| Cu foam@BiNW                                                        | 0.5 M NaHCO <sub>3</sub> | -0.69                         | 95     | 15                                          | [S5]      |
| Bi <sub>2</sub> O <sub>2</sub> CO <sub>3</sub> nanosheets           | 0.1 M NaHCO <sub>3</sub> | -0.7                          | 85     | 9.35                                        | [S6]      |
| Activated Bi <sub>2</sub> Te <sub>3</sub> NPs/C                     | 0.5 M NaHCO <sub>3</sub> | -0.9                          | 89.6   | 14                                          | [S7]      |
| Bi <sub>2</sub> S <sub>3</sub> -Bi <sub>2</sub> O <sub>3</sub> @rGO | 0.1 M KHCO <sub>3</sub>  | -0.9                          | 90.1   | 3.7                                         | [S8]      |
| Fractal-Bi <sub>2</sub> O <sub>3</sub>                              | 0.1 M KHCO <sub>3</sub>  | -1.2                          | 87     | 20.9                                        | [S9]      |
| Bilayer-Bi <sub>12</sub> O <sub>17</sub> Cl <sub>2</sub> nanosheet  | 0.5 M NaHCO <sub>3</sub> | -0.89                         | 93.5   | 11.5                                        | [S10]     |
| BiOBr-templated catalyst                                            | 1.0 M KHCO <sub>3</sub>  | -0.9                          | 96     | 52.8                                        | [S11]     |
| Ultrathin Bi NS                                                     | 0.5 M NaHCO <sub>3</sub> | -0.82                         | 95     | 14                                          | [S12]     |
| Oxide-derived Bi-Sn/CF                                              | 0.5 M KHCO <sub>3</sub>  | -1.14                         | 96     | 43.2                                        | [S13]     |
| Mesoporous-SnO <sub>2</sub> NS                                      | 0.5 M NaHCO <sub>3</sub> | -0.9                          | 83     | 15                                          | [S14]     |
| Sn sheets/GO                                                        | 0.1 M NaHCO <sub>3</sub> | -1.16                         | 89     | 18.8                                        | [S15]     |
| SnO <sub>2</sub> porous nanowire                                    | 0.1 M KHCO <sub>3</sub>  | -0.8                          | 80     | 4.8                                         | [S16]     |
| Bi nanosheets                                                       | 0.1 M KHCO <sub>3</sub>  | -1.1                          | 86     | 16.5                                        | [S17]     |
| Bi dendrite                                                         | 0.5 M KHCO <sub>3</sub>  | -0.74                         | 89     | 2.7                                         | [S18]     |
| Bi <sub>2</sub> S <sub>3</sub> derived Bi                           | 0.5 M NaHCO <sub>3</sub> | -0.75                         | 84     | 4.2                                         | [S19]     |
| Bi nanoflakes                                                       | 0.1 M KHCO <sub>3</sub>  | -0.6                          | 100    | 2                                           | [S20]     |
| Bi-ene                                                              | 0.5 M KHCO <sub>3</sub>  | -0.83                         | 97.5   | 15.28                                       | [S21]     |
| Bi <sub>2</sub> O <sub>3</sub> -NGQDs                               | 0.5 M KHCO <sub>3</sub>  | -0.9                          | 98.1   | 18.1                                        | [S22]     |

**Table S3** Comparison of electrocatalytic CO<sub>2</sub>RR to formate performance on various catalysts in flow cell from recent literature

| Catalysts                                                | Electrolyte             | Potential (V <sub>RHE</sub> ) | FE (%) | <i>j</i> <sub>formate</sub> (mA cm <sup>-2</sup> ) | IR  | Refs.     |
|----------------------------------------------------------|-------------------------|-------------------------------|--------|----------------------------------------------------|-----|-----------|
| BiOCl                                                    | 1 M KOH                 | -1.08                         | 94.65  | 219.3                                              | No  | this work |
| MIL-68(In)-NH <sub>2</sub>                               | 1 M KHCO <sub>3</sub>   | -1.1                          | 94     | 108                                                | No  | [S23]     |
| Bi-ene                                                   | 1 M KOH                 | -0.57                         | 99.8   | 100                                                | No  | [S21]     |
| Bi-ene                                                   | 1 M KOH                 | -0.75                         | 99.2   | 200                                                | No  | [S21]     |
| Bi <sub>2</sub> O <sub>3</sub> @C-800                    | 1 M KOH                 | -1.1                          | 93     | 208                                                | No  | [S2]      |
| Bi <sub>2</sub> O <sub>3</sub> NTs                       | 1 M KHCO <sub>3</sub>   | -0.85                         | 95     | 133                                                | 90% | [S24]     |
| Bi <sub>2</sub> O <sub>3</sub> NTs                       | 1 M KOH                 | -0.58                         | 98     | 206                                                | 90% | [S24]     |
| POD-Bi                                                   | 1 M KOH                 | -0.63                         | 93.6   | 187                                                | 95% | [S25]     |
| BiOBr templated                                          | 2 M KHCO <sub>3</sub>   | /                             | 90     | 180                                                | 90% | [S11]     |
| Bi <sub>2</sub> S <sub>3</sub>                           | 1 M KOH                 | -0.59                         | ~100   | 205                                                | 90% | [S26]     |
| In-Sn                                                    | 0.5 M KHCO <sub>3</sub> | -1.16                         | 87.1   | 62.8                                               | No  | [S27]     |
| SnO <sub>2</sub> nanosheet                               | 1 M KOH                 | -1.13                         | 94.2   | 443.7                                              | Yes | [S28]     |
| Sn-based GDE                                             | 0.5 M KHCO <sub>3</sub> | -1.16                         | 73.0   | 25.0                                               | /   | [S29]     |
| Cu <sub>3</sub> Sn/Cu <sub>6</sub> Sn <sub>5</sub> alloy | 1 M KOH                 | -0.98                         | 87     | 128.8                                              | /   | [S30]     |

**Table S4** The summary of the corresponding fitting date of Cu<sub>2</sub>O electrode at different potentials

| Potential (V <sub>RHE</sub> ) | <i>R</i> <sub>s</sub> (Ω) | <i>R</i> <sub>ct</sub> (Ω) | <i>R</i> <sub>total</sub> (Ω) |
|-------------------------------|---------------------------|----------------------------|-------------------------------|
| -0.25                         | 2.064                     | 4.65                       | 6.714                         |
| -0.20                         | 1.475                     | 24.19                      | 25.665                        |
| -0.15                         | 1.467                     | 46.43                      | 47.897                        |
| -0.10                         | 1.499                     | 20.22                      | 21.719                        |
| -0.05                         | 1.202                     | 10.80                      | 12.002                        |

**Table S5** The summary of electrooxidation performance of Cu<sub>2</sub>O in the complete conversion of formaldehyde under different potentials in three-electrode system

| Potential V <sub>RHE</sub> | C (mM) | FE (%) | Production rate (mmol h <sup>-1</sup> cm <sup>-2</sup> ) |
|----------------------------|--------|--------|----------------------------------------------------------|
| -0.05                      | 35.73  | 99.52  | 0.508                                                    |
| 0.05                       | 79.83  | 98.57  | 0.829                                                    |
| 0.15                       | 83.75  | 98.22  | 1.117                                                    |
| 0.25                       | 87.70  | 95.45  | 1.452                                                    |
| 0.35                       | 86.94  | 92.90  | 1.479                                                    |

C is the concentration formed by formaldehyde electrooxidation.

**Table S6** Comparison of electrochemical CO<sub>2</sub> conversion system on various catalysts from recent literature

| Paired electrolysis     | Anode                                                                          | Cathode                                                                | Reactor   | Performance                       | Refs.     |
|-------------------------|--------------------------------------------------------------------------------|------------------------------------------------------------------------|-----------|-----------------------------------|-----------|
| CO <sub>2</sub> RR//FOR | Cu <sub>2</sub> O<br>1 M KOH+100 mM<br>HCOH<br>FE: 93.67% (HCOO <sup>-</sup> ) | BiOCl<br>0.5 M KHCO <sub>3</sub><br>FE: 93.83%<br>(HCOO <sup>-</sup> ) | H-cell    | 1.05V @ 10.6 mA cm <sup>-2</sup>  | this work |
| CO <sub>2</sub> RR//FOR | Cu <sub>2</sub> O<br>2 M KOH+100 mM<br>HCOH<br>FE: 92.6% (HCOO <sup>-</sup> )  | BiOCl<br>2 M KOH<br>FE: 92.6%<br>(HCOO <sup>-</sup> )                  | Flow cell | 1.2 V @ 100.2 mA cm <sup>-2</sup> | this work |
| CO <sub>2</sub> RR//FOR | Cu <sub>2</sub> O<br>1 M KOH+100 mM                                            | BiOCl<br>1 M KOH                                                       | MEA       | 1.0 V @ 126.9 mA cm <sup>-2</sup> | this work |

|                         |                                                                                   |                                                                                     |              |                                   |       |  |
|-------------------------|-----------------------------------------------------------------------------------|-------------------------------------------------------------------------------------|--------------|-----------------------------------|-------|--|
|                         | HCOH<br>FE: 93.04% (HCOO <sup>-</sup> )                                           | FE: 93.04%<br>(HCOO <sup>-</sup> )                                                  |              |                                   |       |  |
| CO <sub>2</sub> RR//MOR | CuONS/CF<br>1 M KOH+1 M CH <sub>3</sub> OH<br>FE: 91.3% (HCOO <sup>-</sup> )      | mSnO <sub>2</sub> /CC<br>1 M KHCO <sub>3</sub><br>FE: 80.5%<br>(HCOO <sup>-</sup> ) | H-cell       | 1.22 V @ 20 mA cm <sup>-2</sup>   | [S31] |  |
| CO <sub>2</sub> RR//OER | Ir/C<br>0.5 M KHCO <sub>3</sub>                                                   | BiNS<br>0.5 M KHCO <sub>3</sub><br>FE: 95%<br>(HCOO <sup>-</sup> )                  | H-cell       | 3.0 V @ 8 mA cm <sup>-2</sup>     | [S12] |  |
| CO <sub>2</sub> RR//OER | RuO <sub>2</sub><br>1 M KOH                                                       | Bi-ene<br>0.5 M KHCO <sub>3</sub>                                                   | H-cell       | 2.38 V @ 10 mA cm <sup>-2</sup>   | [S21] |  |
| CO <sub>2</sub> RR//MOR | Ni-NF-AF<br>1 M KOH+0.5 M<br>CH <sub>3</sub> OH<br>FE: ~100% (HCOO <sup>-</sup> ) | Bi-enes<br>0.5 M KHCO <sub>3</sub><br>FE: ~100%<br>(HCOO <sup>-</sup> )             | H-cell       | 2.13 V @ 10 mA cm <sup>-2</sup>   | [S32] |  |
| CO <sub>2</sub> RR//HMF | NiO NPS<br>0.5 M KHCO <sub>3</sub> +10 mM<br>HMF<br>FE: 36% (FDCA,<br>FFCA, DFF)  | BiO <sub>x</sub><br>0.5 M KHCO <sub>3</sub><br>FE: 81%<br>(HCOO <sup>-</sup> )      | H-cell       | 2.5 V @ 2 mA cm <sup>-2</sup>     | [S33] |  |
| CO <sub>2</sub> RR//OER | Mesoporous-SnO <sub>2</sub><br>0.5 M NaHCO <sub>3</sub><br>FE: 50% (formate)      | IrO <sub>2</sub> /Ti foil<br>0.5 M NaHCO <sub>3</sub>                               | H-cell       | 3 V @ 7.3 mA cm <sup>-2</sup>     | [S14] |  |
| CO <sub>2</sub> RR//GOR | Pt nanoparticle<br>2 M KOH+2 M<br>glycerol                                        | Sn nanoparticle<br>2 M KOH<br>FE: 85.0%<br>(HCOO <sup>-</sup> )                     | Flow<br>cell | 1.5 V @ 72.95 mA cm <sup>-2</sup> | [S34] |  |
| CO <sub>2</sub> RR//GOR | Pt nanoparticle<br>2 M KOH+2 M<br>glycerol                                        | Ag nanoparticle<br>2 M KOH<br>FE: 94.7% (CO)                                        | Flow<br>cell | 1.5 V @ 93.42 mA cm <sup>-2</sup> | [S34] |  |
| CO <sub>2</sub> RR//UOR | Ni-WO <sub>x</sub><br>1 M KOH+0.33 M urea                                         | Ag NPs<br>FE: 98% (CO)                                                              | MEA          | 2.16 V @ 100 mA cm <sup>-2</sup>  | [S35] |  |
| CO <sub>2</sub> RR//OER | Ni-WO <sub>x</sub><br>1 M KOH                                                     | Ag NPs                                                                              | MEA          | 2.53 V @ 100 mA cm <sup>-2</sup>  | [S35] |  |
| CO <sub>2</sub> RR//OER | Foam nickel<br>1 M KOH                                                            | MIL-68(In)-NH <sub>2</sub><br>FE: 92.2%<br>(HCOO <sup>-</sup> )                     | MEA          | 2.7 V @ 258 mA cm <sup>-2</sup>   | [S23] |  |

## Supplementary References

- [S1] P. Deng, H. Wang, R. Qi, J. Zhu, S. Chen et al., Bismuth oxides with enhanced bismuth-oxygen structure for efficient electrochemical reduction of carbon dioxide to formate. *ACS Catal.* **10**(1), 743-750 (2020). <https://doi.org/10.1021/acscatal.9b04043>
- [S2] P. Deng, F. Yang, Z. Wang, S. Chen, Y. Zhou et al., Metal-organic framework-derived carbon nanorods encapsulating bismuth oxides for rapid and selective CO<sub>2</sub> electroreduction to formate. *Angew. Chem. Int. Ed.* **59**(27), 10807-10813 (2020). <https://doi.org/10.1002/anie.202000657>
- [S3] S. Liu, X.F. Lu, J. Xiao, X. Wang, X.W. Lou, Bi<sub>2</sub>O<sub>3</sub> nanosheets grown on multi-channel carbon matrix to catalyze efficient CO<sub>2</sub> electroreduction to HCOOH. *Angew. Chem. Int. Ed.* **58**(39), 13828-13833 (2019). <https://doi.org/10.1002/anie.201907674>
- [S4] Y.X. Duan, K.H. Liu, Q. Zhang, J.M. Yan, Q. Jiang, Efficient CO<sub>2</sub> reduction to HCOOH with high selectivity and energy efficiency over Bi/rGO catalyst. *Small Methods* **4**(5), 1900846 (2020). <https://doi.org/10.1002/smt.201900846>

- [S5] X. Zhang, X. Sun, S.X. Guo, A.M. Bond, J. Zhang, Formation of lattice-dislocated bismuth nanowires on copper foam for enhanced electrocatalytic CO<sub>2</sub> reduction at low overpotential. *Energy Environ. Sci.* **12**(4), 1334-1340 (2019). <https://doi.org/10.1039/c9ee00018f>
- [S6] Y. Zhang, X. Zhang, Y. Ling, F. Li, A.M. Bond et al., Controllable synthesis of few-layer bismuth subcarbonate by electrochemical exfoliation for enhanced CO<sub>2</sub> reduction performance. *Angew. Chem. Int. Ed.* **57**(40), 13283-13287 (2018). <https://doi.org/10.1002/anie.201807466>
- [S7] N. Zhang, F. Zheng, B. Huang, Y. Ji, Q. Shao et al., Exploring Bi<sub>2</sub>Te<sub>3</sub> nanoplates as versatile catalysts for electrochemical reduction of small molecules. *Adv. Mater.* **32**(22), 1906477 (2020). <https://doi.org/10.1002/adma.201906477>
- [S8] X. Yang, P. Deng, D. Liu, S. Zhao, D. Li et al., Partial sulfuration-induced defect and interface tailoring on bismuth oxide for promoting electrocatalytic CO<sub>2</sub> reduction. *J. Mater. Chem. A* **8**(5), 2472-2480 (2020). <https://doi.org/10.1039/c9ta11363k>
- [S9] T. Tran-Phu, R. Daiyan, Z. Fusco, Z. Ma, R. Amal et al., Nanostructured  $\beta$ -Bi<sub>2</sub>O<sub>3</sub> fractals on carbon fibers for highly selective CO<sub>2</sub> electroreduction to formate. *Adv. Funct. Mater.* **30**(3), 1906478 (2020). <https://doi.org/10.1002/adfm.201906478>
- [S10] J. Zhu, J. Fan, T. Cheng, M. Cao, Z. Sun et al., Bilayer nanosheets of unusual stoichiometric bismuth oxychloride for potassium ion storage and CO<sub>2</sub> reduction. *Nano Energy* **75**, 104939 (2020). <https://doi.org/10.1016/j.nanoen.2020.104939>
- [S11] F.P.G.D. Arquer, O.S. Bushuyev, P.D. Luna, C.T. Dinh, A. Seifitokaldani et al., 2D metal oxyhalide-derived catalysts for efficient CO<sub>2</sub> electroreduction. *Adv. Mater.* **30**(38), 1802858 (2018). <https://doi.org/10.1002/adma.201802858>
- [S12] N. Han, Y. Wang, H. Yang, J. Deng, J. Wu et al., Ultrathin bismuth nanosheets from in situ topotactic transformation for selective electrocatalytic CO<sub>2</sub> reduction to formate. *Nat. Commun.* **9**, 1320 (2018). <https://doi.org/10.1038/s41467-018-03712-z>
- [S13] G. Wen, D.U. Lee, B. Ren, F.M. Hassan, G. Jiang et al., Orbital interactions in Bi-Sn bimetallic electrocatalysts for highly selective electrochemical CO<sub>2</sub> reduction toward formate production. *Adv. Energy Mater.* **8**(31), 1802427 (2018). <https://doi.org/10.1002/aenm.201802427>
- [S14] N. Han, Y. Wang, J. Deng, J. Zhou, Y. Wu et al., Self-templated synthesis of hierarchical mesoporous SnO<sub>2</sub> nanosheets for selective CO<sub>2</sub> reduction. *J. Mater. Chem. A* **7**(3), 1267-1272 (2019). <https://doi.org/10.1039/c8ta10959a>
- [S15] F. Lei, W. Liu, Y. Sun, J. Xu, K. Liu et al., Metallic tin quantum sheets confined in graphene toward high-efficiency carbon dioxide electroreduction. *Nat. Commun.* **7**, 12697 (2016). <https://doi.org/10.1038/ncomms12697>
- [S16] B. Kumar, V. Atla, J.P. Brian, S. Kumari, T.Q. Nguyen et al., Reduced SnO<sub>2</sub> porous nanowires with a high density of grain boundaries as catalysts for efficient electrochemical CO<sub>2</sub>-into-HCOOH Conversion. *Angew. Chem. Int. Ed.* **56**(13), 3645-3649 (2017). <https://doi.org/10.1002/anie.201612194>
- [S17] W. Zhang, Y. Hu, L. Ma, G. Zhu, P. Zhao et al., Liquid-phase exfoliated ultrathin Bi nanosheets: uncovering the origins of enhanced electrocatalytic CO<sub>2</sub> reduction on two-dimensional metal nanostructure. *Nano Energy* **53**, 808-816 (2018). <https://doi.org/10.1016/j.nanoen.2018.09.053>
- [S18] J.H. Koh, D.H. Won, T. Eom, N.K. Kim, K.D. Jung et al., Facile CO<sub>2</sub> electro-reduction to formate via oxygen bidentate intermediate stabilized by high-index planes of Bi

- dendrite catalyst. *ACS Catal.* **7**(8), 5071-5077 (2017).  
<https://doi.org/10.1021/acscatal.7b00707>
- [S19] Y. Zhang, F. Li, X. Zhang, T. Williams, C.D. Easton et al., Electrochemical reduction of CO<sub>2</sub> on defect-rich Bi derived from Bi<sub>2</sub>S<sub>3</sub> with enhanced formate selectivity. *J. Mater. Chem. A* **6**(11), 4714-4720 (2018). <https://doi.org/10.1039/c8ta00023a>
- [S20] S. Kim, W.J. Dong, S. Gim, W. Sohn, J.Y. Park et al., Shape-controlled bismuth nanoflakes as highly selective catalysts for electrochemical carbon dioxide reduction to formate. *Nano Energy* **39**, 44-52 (2017). <https://doi.org/10.1016/j.nanoen.2017.05.065>
- [S21] C. Cao, D.D. Ma, J.F. Gu, X. Xie, G. Zeng et al., Metal-organic layers leading to atomically thin bismuthene for efficient carbon dioxide electroreduction to liquid fuel. *Angew. Chem. Int. Ed.* **59**(35), 15014-15020 (2020).  
<https://doi.org/10.1002/anie.202005577>
- [S22] Z. Chen, K. Mou, X. Wang, L. Liu, Nitrogen-doped graphene quantum dots enhance the activity of Bi<sub>2</sub>O<sub>3</sub> nanosheets for electrochemical reduction of CO<sub>2</sub> in a wide negative potential region. *Angew. Chem. Int. Ed.* **57**(39), 12790-12794 (2018).  
<https://doi.org/10.1002/anie.201807643>
- [S23] Z. Wang, Y. Zhou, C. Xia, W. Guo, B. You et al., Efficient electroconversion of carbon dioxide to formate by a reconstructed amino-functionalized indium-organic framework electrocatalyst. *Angew. Chem. Int. Ed.* **60**(35), 19107-19112 (2021).  
<https://doi.org/10.1002/anie.202107523>
- [S24] Q. Gong, P. Ding, M. Xu, X. Zhu, M. Wang et al., Structural defects on converted bismuth oxide nanotubes enable highly active electrocatalysis of carbon dioxide reduction. *Nat. Commun.* **10**, 2807 (2019). <https://doi.org/10.1038/s41467-019-10819-4>
- [S25] S. He, F. Ni, Y. Ji, L. Wang, Y. Wen et al., The p-orbital delocalization of main-group metals to boost CO<sub>2</sub> electroreduction. *Angew. Chem. Int. Ed.* **57**(49), 16114-16119 (2018). <https://doi.org/10.1002/anie.201810538>
- [S26] P. Ding, J. Zhang, N. Han, Y. Zhou, L. Jia et al., Simultaneous power generation and CO<sub>2</sub> valorization by aqueous Al-CO<sub>2</sub> batteries using nanostructured Bi<sub>2</sub>S<sub>3</sub> as the cathode electrocatalyst. *J. Mater. Chem. A* **8**(25), 12385-12390 (2020).  
<https://doi.org/10.1039/d0ta03761c>
- [S27] Q. Wang, Y. Wu, C. Zhu, R. Xiong, Y. Deng et al., Sn nanoparticles deposited onto a gas diffusion layer via impregnation-electroreduction for enhanced CO<sub>2</sub> electroreduction to formate. *Electrochim. Acta* **369**(10), 137662 (2021).  
<https://doi.org/10.1016/j.electacta.2020.137662>
- [S28] J. Li, J. Jiao, H. Zhang, P. Zhu, H. Ma et al., Two-dimensional SnO<sub>2</sub> nanosheets for efficient carbon dioxide electroreduction to formate. *ACS Sustainable Chem. Eng.* **8**(12), 4975-4982 (2020). <https://doi.org/10.1021/acssuschemeng.0c01070>
- [S29] Q. Wang, X. Wang, C. Wu, Y. Cheng, Q. Sun et al., Electrodeposition of tin on Nafion-bonded carbon black as an active catalyst layer for efficient electroreduction of CO<sub>2</sub> to formic acid. *Sci. Rep.* **7**, 13711 (2017). <https://doi.org/10.1038/s41598-017-14233-y>
- [S30] J. Wang, J. Zou, X. Hu, S. Ning, X. Wang et al., Heterostructured intermetallic CuSn catalysts: high performance towards the electrochemical reduction of CO<sub>2</sub> to formate. *J. Mater. Chem. A* **7**(48), 27514-27521 (2019). <https://doi.org/10.1039/c9ta11140a>
- [S31] X. Wei, Y. Li, L. Chen, J. Shi, Formic acid electro-synthesis by concurrent cathodic CO<sub>2</sub> reduction and anodic CH<sub>3</sub>OH oxidation. *Angew. Chem. Int. Ed.* **60**(6), 3148-3155 (2021). <https://doi.org/10.1002/anie.202012066>



- [S32] C. Cao, D.D. Ma, J. Jia, Q. Xu, X.T. Wu et al., Divergent paths, same goal: a pair-electrosynthesis tactic for cost-efficient and exclusive formate production by metal-organic-framework-derived 2D electrocatalysts. *Adv. Mater.* **33**(25), 2008631 (2021). <https://doi.org/10.1002/adma.202008631>
- [S33] S. Choi, M. Balamurugan, K.G. Lee, K.H. Cho, S. Park et al., Mechanistic investigation of biomass oxidation using nickel oxide nanoparticles in a CO<sub>2</sub>-saturated electrolyte for paired electrolysis. *J. Phys. Chem. Lett.* **11**(8), 2941-2948 (2020). <https://doi.org/10.1021/acs.jpcclett.0c00425>
- [S34] S. Verma, S. Lu, P.J.A. Kenis, Co-electrolysis of CO<sub>2</sub> and glycerol as a pathway to carbon chemicals with improved technoconomics due to low electricity consumption. *Nat. Energy* **4**(6), 466-474 (2019). <https://doi.org/10.1038/s41560-019-0374-6>
- [S35] L. Wang, Y. Zhu, Y. Wen, S. Li, C. Cui et al., Regulating the local charge distribution of Ni active sites for the urea oxidation reaction. *Angew. Chem. Int. Ed.* **60**(19), 10577-10582 (2021). <https://doi.org/10.1002/anie.202100610>
